# Supplementary material for: Mesocosm Design and Implementation of Two Synchronized Case Study Experiments to Determine the Impacts of Salinization and Climate Change on the Structure and Functioning of Shallow Lakes
Source: MDPI journal article supplement (doi:10.3390/w15142611), 2023-07-18
Supplement: s1 [file s1]

## Supplementary Material

For: Özkan, K.; Korkmaz, M.; Amorim, C.A.; Yılmaz, G.; Koru, M.; Can, Y.; Pacheco, J.P.; Acar, V.; Çolak, M.A.; Yavuz, G.C.; et al. Mesocosm Design and Implementation of Two Synchronized Case Study Experiments to Determine the Impacts of Salinization and Climate Change on the Structure and Functioning of Shallow Lakes. *Water* 2023, 15,

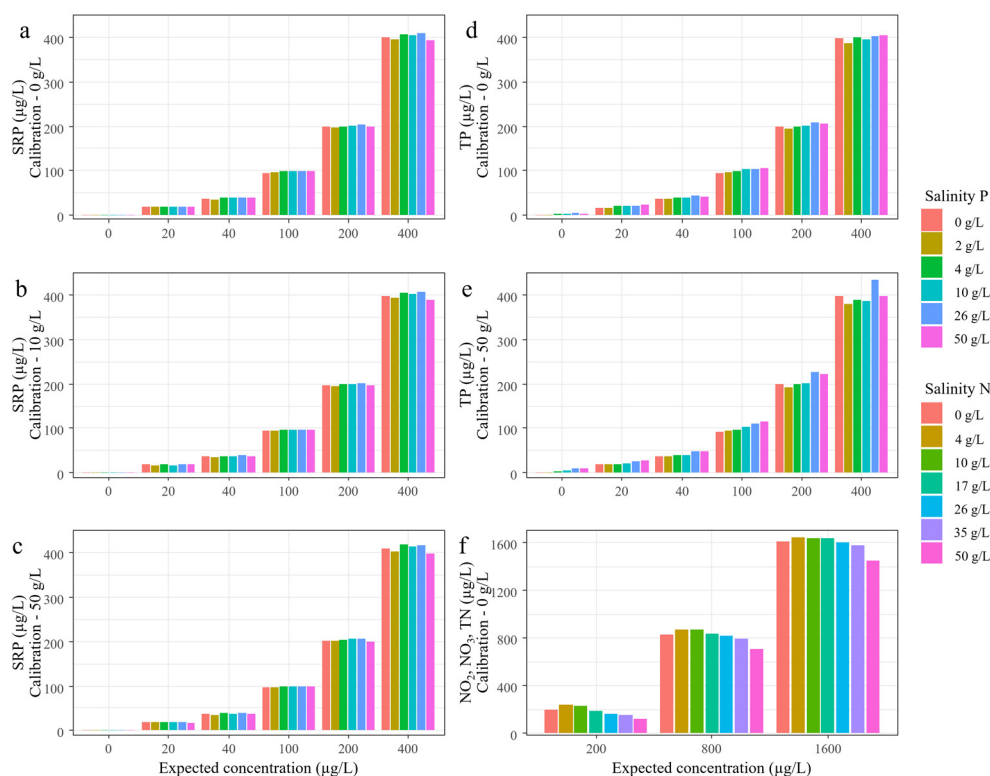

**Figure S1.** Effects of salinity on the method performance for soluble reactive phosphorus (SRP) (a–c), total phosphorus (TP) (d,e), nitrite (NO<sub>2</sub>), nitrate (NO<sub>3</sub>), and total nitrogen (TN) (f) quantifications. The standards and samples were prepared with different phosphorus, nitrogen, and salinity concentrations and calibrated with different salinity matrixes (0, 10, and/or 50 g/L).

**Table S1.** Results of four-way ART-ANOVA comparing water transparency, chlorophyll-a, total suspended solids, soluble reactive phosphorus, total phosphorus, nitrate and nitrite, and total nitrogen based on the factors Place, Salinity, Heating, Phases, and their possible interactions during the heatwave experiment. Bold values represent significant effects ( $p < 0.05$ ).

| Factor                  | df | F-Value        | p-Value          |
|-------------------------|----|----------------|------------------|
| Water transparency (cm) |    |                |                  |
| Place                   | 1  | <b>111.874</b> | <b>&lt;0.001</b> |
| Salinity                | 1  | <b>89.918</b>  | <b>&lt;0.001</b> |
| Heating                 | 1  | 0.597          | 0.442            |
| Phases                  | 3  | <b>2.938</b>   | <b>0.037</b>     |
| Place:Salinity          | 1  | <b>14.202</b>  | <b>&lt;0.001</b> |
| Place:Heating           | 1  | 0.458          | 0.500            |
| Salinity:Heating        | 1  | 0.330          | 0.567            |
| Place:Phases            | 3  | 1.021          | 0.387            |
| Salinities:Phases       | 3  | <b>41.042</b>  | <b>&lt;0.001</b> |
| Heating:Phases          | 3  | 0.297          | 0.828            |

|                                    |   |                |                  |
|------------------------------------|---|----------------|------------------|
| Place:Salinity:Heating             | 1 | 1.776          | 0.186            |
| Place:Salinity:Phases              | 3 | <b>6.581</b>   | <b>&lt;0.001</b> |
| Place:Heating:Phases               | 3 | 0.379          | 0.768            |
| Salinity:Heating:Phases            | 3 | 0.548          | 0.650            |
| Place:Salinity:Heating:Phases      | 3 | 0.550          | 0.649            |
| Chlorophyll- <i>a</i> (µg/L)       |   |                |                  |
| Place                              | 1 | <b>100.211</b> | <b>&lt;0.001</b> |
| Salinity                           | 1 | <b>173.984</b> | <b>&lt;0.001</b> |
| Heating                            | 1 | 3.179          | 0.078            |
| Phases                             | 3 | <b>13.175</b>  | <b>&lt;0.001</b> |
| Place:Salinity                     | 1 | <b>23.349</b>  | <b>&lt;0.001</b> |
| Place:Heating                      | 1 | 0.345          | 0.558            |
| Salinity:Heating                   | 1 | 2.550          | 0.114            |
| Place:Phases                       | 3 | <b>21.831</b>  | <b>&lt;0.001</b> |
| Salinities:Phases                  | 3 | <b>29.751</b>  | <b>&lt;0.001</b> |
| Heating:Phases                     | 3 | 0.422          | 0.738            |
| Place:Salinity:Heating             | 1 | 2.560          | 0.113            |
| Place:Salinity:Phases              | 3 | <b>14.943</b>  | <b>&lt;0.001</b> |
| Place:Heating:Phases               | 3 | 0.836          | 0.477            |
| Salinity:Heating:Phases            | 3 | 0.218          | 0.884            |
| Place:Salinity:Heating:Phases      | 3 | 1.385          | 0.252            |
| Total suspended solids (mg/L)      |   |                |                  |
| Place                              | 1 | <b>46.677</b>  | <b>&lt;0.001</b> |
| Salinity                           | 1 | <b>264.751</b> | <b>&lt;0.001</b> |
| Heating                            | 1 | <b>31.080</b>  | <b>&lt;0.001</b> |
| Phases                             | 3 | <b>41.419</b>  | <b>&lt;0.001</b> |
| Place:Salinity                     | 1 | <b>58.264</b>  | <b>&lt;0.001</b> |
| Place:Heating                      | 1 | 0.968          | 0.328            |
| Salinity:Heating                   | 1 | <b>24.623</b>  | <b>&lt;0.001</b> |
| Place:Phases                       | 3 | <b>20.705</b>  | <b>&lt;0.001</b> |
| Salinities:Phases                  | 3 | <b>57.263</b>  | <b>&lt;0.001</b> |
| Heating:Phases                     | 3 | <b>8.303</b>   | <b>&lt;0.001</b> |
| Place:Salinity:Heating             | 1 | 1.391          | 0.241            |
| Place:Salinity:Phases              | 3 | <b>26.732</b>  | <b>&lt;0.001</b> |
| Place:Heating:Phases               | 3 | 0.503          | 0.681            |
| Salinity:Heating:Phases            | 3 | <b>9.512</b>   | <b>&lt;0.001</b> |
| Place:Salinity:Heating:Phases      | 3 | 1.107          | 0.350            |
| Soluble reactive phosphorus (µg/L) |   |                |                  |
| Place                              | 1 | <b>174.225</b> | <b>&lt;0.001</b> |
| Salinity                           | 1 | <b>180.535</b> | <b>&lt;0.001</b> |
| Heating                            | 1 | 1.812          | 0.181            |
| Phases                             | 3 | <b>64.413</b>  | <b>&lt;0.001</b> |
| Place:Salinity                     | 1 | <b>150.797</b> | <b>&lt;0.001</b> |
| Place:Heating                      | 1 | 0.771          | 0.382            |
| Salinity:Heating                   | 1 | 0.843          | 0.361            |
| Place:Phases                       | 3 | <b>83.019</b>  | <b>&lt;0.001</b> |
| Salinities:Phases                  | 3 | <b>92.633</b>  | <b>&lt;0.001</b> |
| Heating:Phases                     | 3 | <b>4.363</b>   | <b>0.006</b>     |
| Place:Salinity:Heating             | 1 | <b>11.010</b>  | <b>0.001</b>     |
| Place:Salinity:Phases              | 3 | <b>64.235</b>  | <b>&lt;0.001</b> |
| Place:Heating:Phases               | 3 | <b>5.474</b>   | <b>0.002</b>     |
| Salinity:Heating:Phases            | 3 | <b>2.861</b>   | <b>0.041</b>     |

|                               |   |                |                  |
|-------------------------------|---|----------------|------------------|
| Place:Salinity:Heating:Phases | 3 | <b>3.619</b>   | <b>0.016</b>     |
| Total phosphorus (µg/L)       |   |                |                  |
| Place                         | 1 | <b>186.595</b> | <b>&lt;0.001</b> |
| Salinity                      | 1 | <b>18.604</b>  | <b>&lt;0.001</b> |
| Heating                       | 1 | 1.292          | 0.258            |
| Phases                        | 3 | <b>31.790</b>  | <b>&lt;0.001</b> |
| Place:Salinity                | 1 | <b>4.647</b>   | <b>0.034</b>     |
| Place:Heating                 | 1 | 0.050          | 0.824            |
| Salinity:Heating              | 1 | <b>30.803</b>  | <b>&lt;0.001</b> |
| Place:Phases                  | 3 | <b>25.432</b>  | <b>&lt;0.001</b> |
| Salinities:Phases             | 3 | <b>7.522</b>   | <b>&lt;0.001</b> |
| Heating:Phases                | 3 | 0.212          | 0.888            |
| Place:Salinity:Heating        | 1 | <b>17.379</b>  | <b>&lt;0.001</b> |
| Place:Salinity:Phases         | 3 | <b>8.285</b>   | <b>&lt;0.001</b> |
| Place:Heating:Phases          | 3 | 1.388          | 0.251            |
| Salinity:Heating:Phases       | 3 | <b>4.472</b>   | <b>0.006</b>     |
| Place:Salinity:Heating:Phases | 3 | <b>4.843</b>   | <b>0.004</b>     |
| Nitrate and nitrite (µg/L)    |   |                |                  |
| Place                         | 1 | <b>128.536</b> | <b>&lt;0.001</b> |
| Salinity                      | 1 | 1.831          | 0.179            |
| Heating                       | 1 | <b>8.908</b>   | <b>0.004</b>     |
| Phases                        | 3 | <b>35.526</b>  | <b>&lt;0.001</b> |
| Place:Salinity                | 1 | <b>16.180</b>  | <b>&lt;0.001</b> |
| Place:Heating                 | 1 | 2.828          | 0.096            |
| Salinity:Heating              | 1 | <b>14.593</b>  | <b>&lt;0.001</b> |
| Place:Phases                  | 3 | <b>6.393</b>   | <b>&lt;0.001</b> |
| Salinities:Phases             | 3 | <b>10.646</b>  | <b>&lt;0.001</b> |
| Heating:Phases                | 3 | 0.893          | 0.448            |
| Place:Salinity:Heating        | 1 | <b>15.110</b>  | <b>&lt;0.001</b> |
| Place:Salinity:Phases         | 3 | <b>12.169</b>  | <b>&lt;0.001</b> |
| Place:Heating:Phases          | 3 | 1.802          | 0.152            |
| Salinity:Heating:Phases       | 3 | 0.745          | 0.528            |
| Place:Salinity:Heating:Phases | 3 | 2.234          | 0.089            |
| Total nitrogen (µg/L)         |   |                |                  |
| Place                         | 1 | <b>32.755</b>  | <b>&lt;0.001</b> |
| Salinity                      | 1 | <b>169.489</b> | <b>&lt;0.001</b> |
| Heating                       | 1 | 0.457          | 0.501            |
| Phases                        | 3 | <b>13.175</b>  | <b>&lt;0.001</b> |
| Place:Salinity                | 1 | 0.381          | 0.538            |
| Place:Heating                 | 1 | <b>8.087</b>   | <b>0.005</b>     |
| Salinity:Heating              | 1 | 2.979          | 0.088            |
| Place:Phases                  | 3 | <b>26.390</b>  | <b>&lt;0.001</b> |
| Salinities:Phases             | 3 | <b>15.797</b>  | <b>&lt;0.001</b> |
| Heating:Phases                | 3 | 2.111          | 0.104            |
| Place:Salinity:Heating        | 1 | 1.862          | 0.176            |
| Place:Salinity:Phases         | 3 | <b>21.862</b>  | <b>&lt;0.001</b> |
| Place:Heating:Phases          | 3 | <b>4.745</b>   | <b>0.004</b>     |
| Salinity:Heating:Phases       | 3 | 1.542          | 0.209            |
| Place:Salinity:Heating:Phases | 3 | 0.603          | 0.615            |
